# Supplementary material for: Systematic interaction network filtering identifies CRMP1 as a novel suppressor of huntingtin misfolding and neurotoxicity
Source: PubMed Central journal article supplement — Genome Res. 2015 May;25(5):701–13. doi: 10.1101/gr.182444.114 (PMC4417118; doi:10.1101/gr.182444.114), 2015-05
Supplement: supp_gr.182444.114_Supplemental_Information.pdf [file supp_gr.182444.114_Supplemental_Information.pdf]

# Supplemental Information

## Supplemental Figures

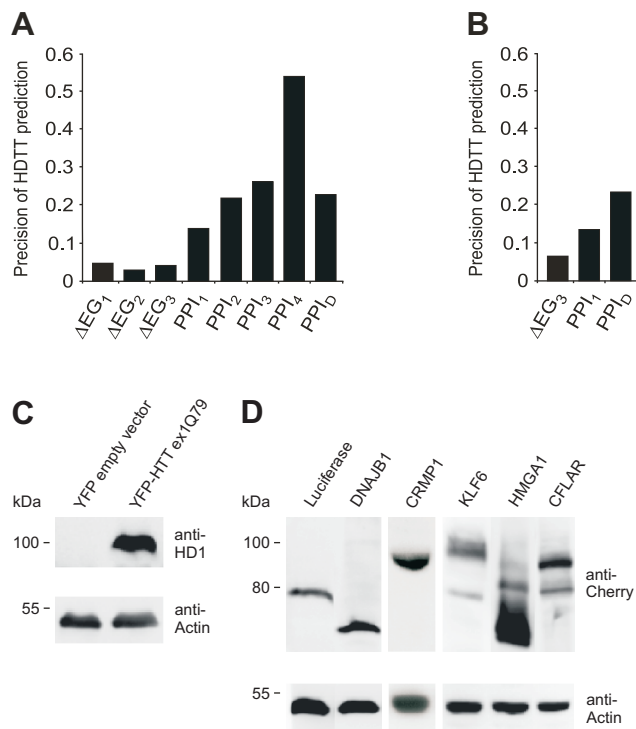

Figure S1

**A**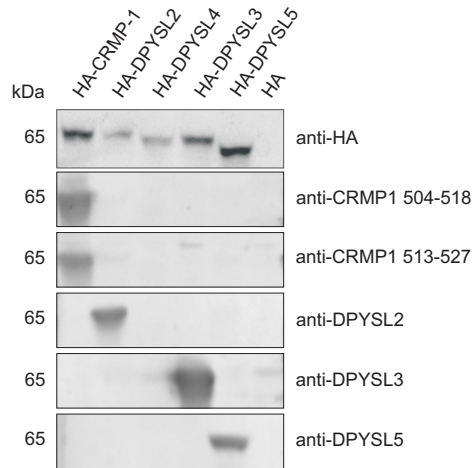**B**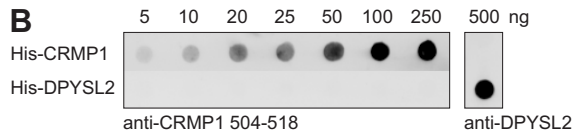**C**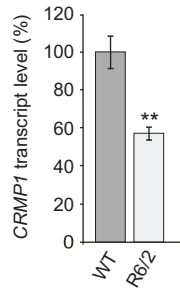**D**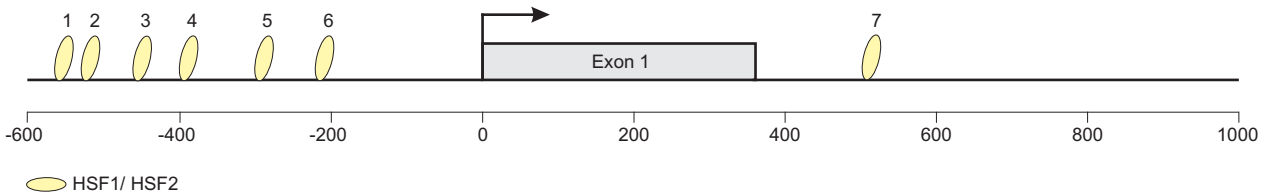**Figure S2**

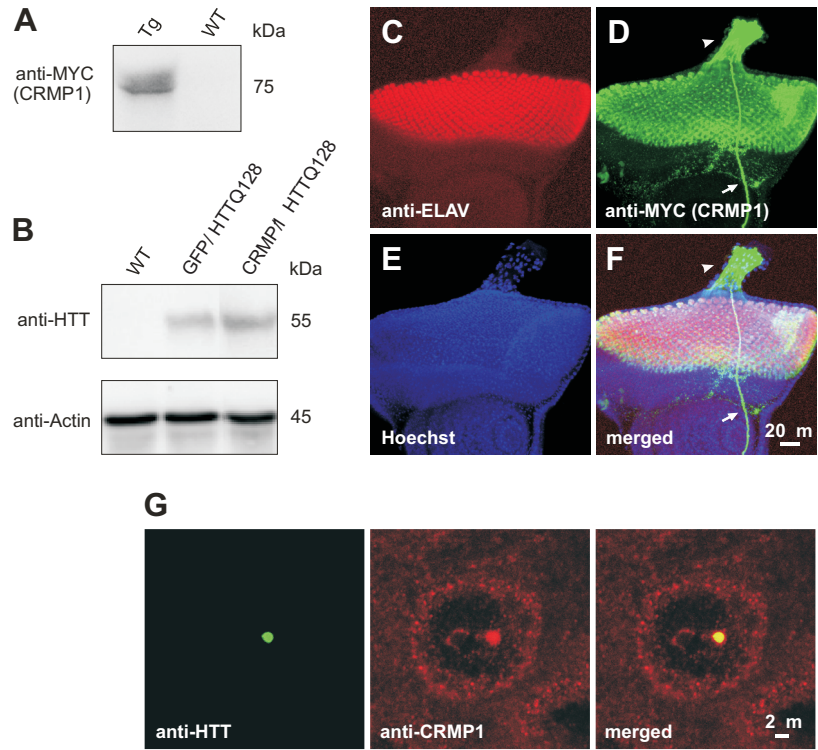

Figure S3

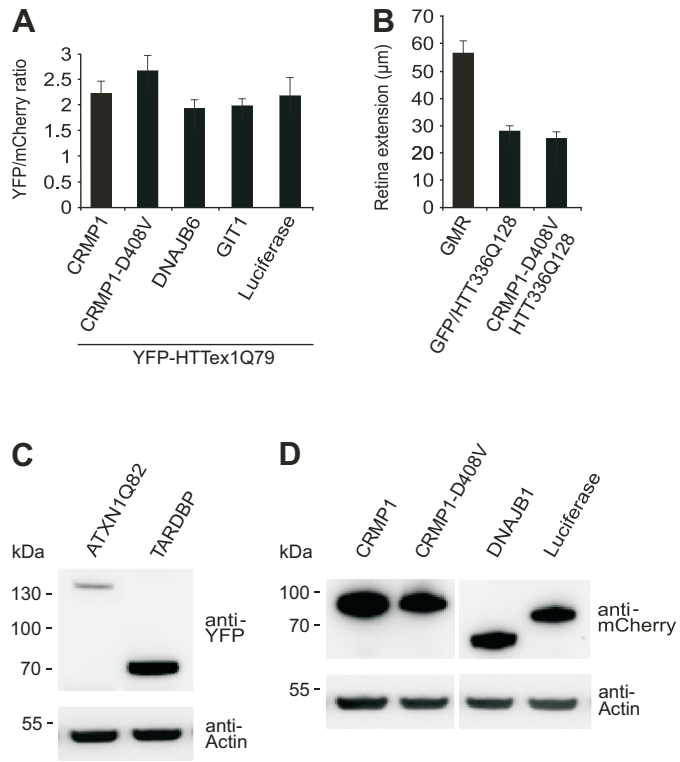

Figure S4

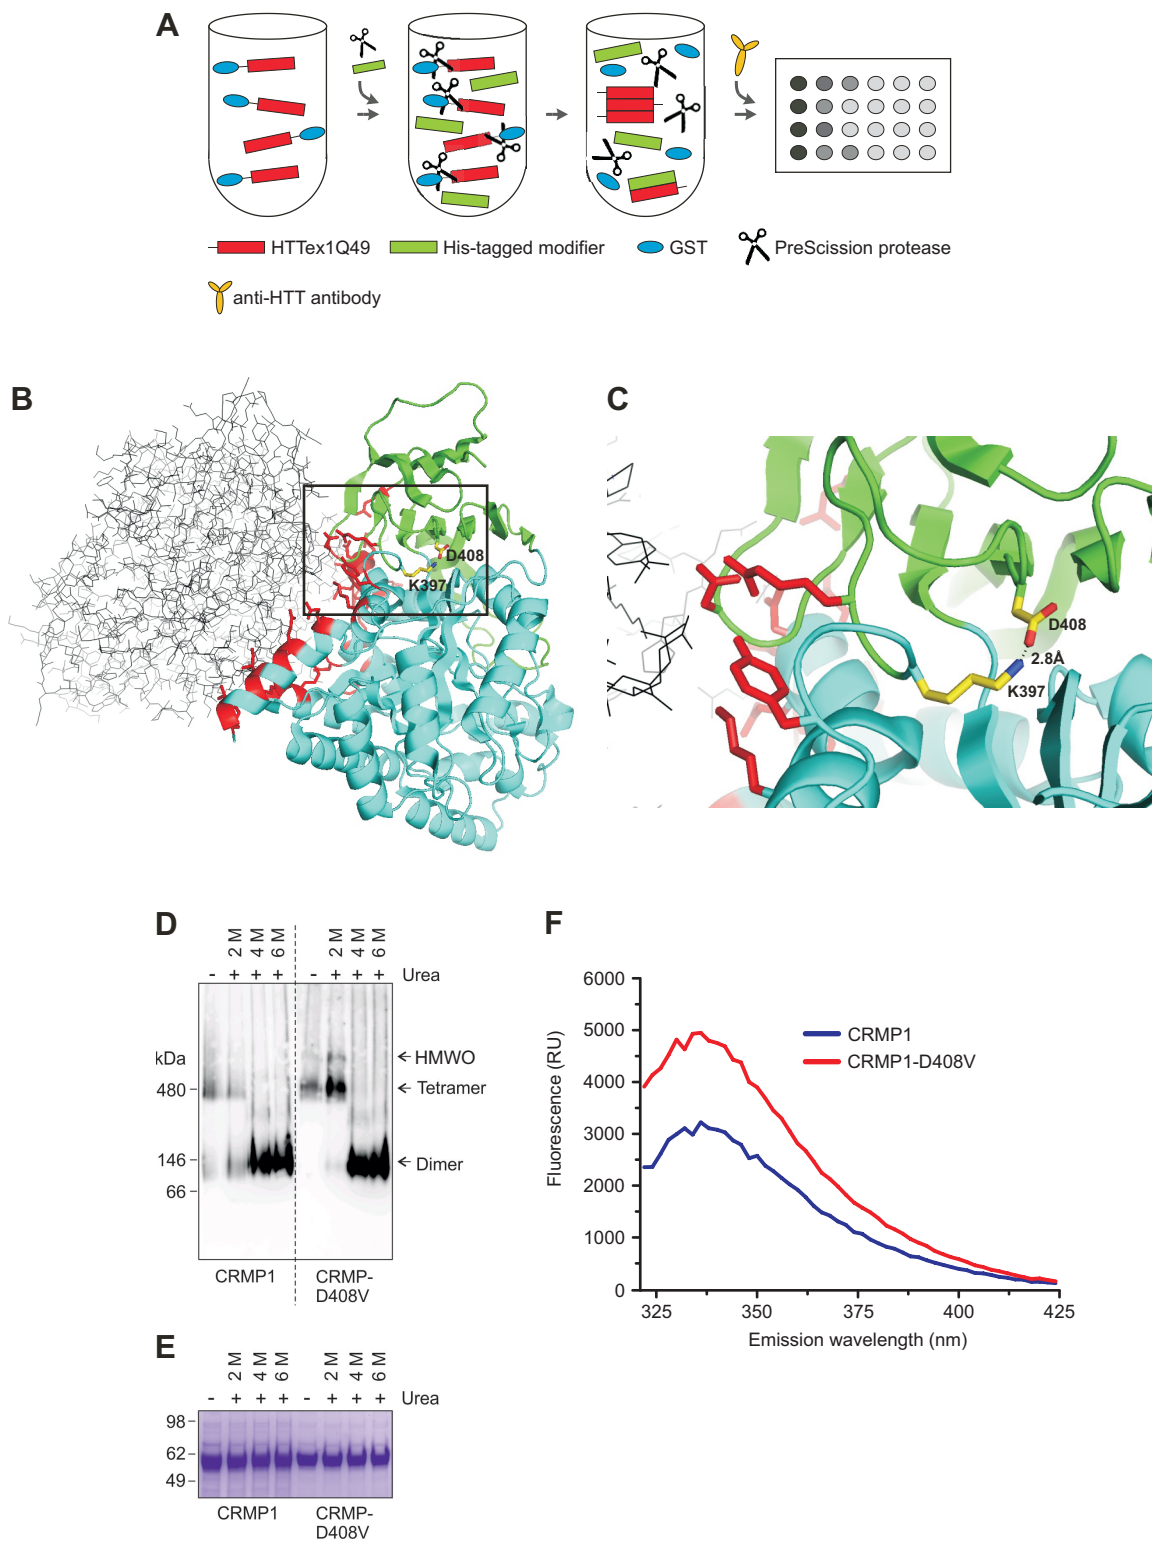

Figure S5

## Supplemental Figure Legends

**Figure S1. Benchmarking of the protein interaction filtering strategy and comparison with available literature information; expression controls in cell model systems.** (A) The precision of prediction of known HDTTs was determined for different PPI data sets (PPI<sub>1-4</sub> and PPI<sub>D</sub>) as well as for data sets with differentially expressed genes ( $\Delta$ EG<sub>1-3</sub>). Step-by-step data filtering reduces the size of PPI data sets but increases the relative number of HDTTs in PPI networks. (B) Optimization of PPI<sub>D</sub> by optimizing the threshold to define  $\Delta$ EG<sub>3</sub> does not increase the precision of prediction of known HDTTs in the PPI<sub>D</sub> network compared to (A). (C) SDS-PAGE and immunoblotting confirms the expression of YFP-tagged HTT<sub>ex1Q79</sub> in transfected SH-EP cells using the HTT specific HD1 antibody. (D) Expression control of the mCherry tagged proteins luciferase, CRMP1, DNAJB1, KLF6, HMGA1 and CFLAR, which were co-expressed with the aggregation prone HTT<sub>ex1Q79</sub> protein using an anti-mCherry antibody. All proteins were expressed in SH-EP cells with their expected sizes.

**Figure S2. Characterization of anti-CRMP1 antibodies and potential HSF1 and HSF2 binding sites around the transcriptional start site in the transcript encoding CRMP1.** (A, B) Investigating the specificity of polyclonal anti-CRMP1 antibodies. (A) Protein extracts with different HA-tagged CRMP proteins were prepared from transfected COS7 cells and analyzed by SDS-PAGE and immunoblotting. The anti-CRMP1 antibodies 504-518 and 513-527 specifically recognize CRMP1. (B) Dot blot assay. Different amounts of natively purified His7-CRMP1 protein were spotted onto a nitrocellulose membrane. The anti-CRMP1 antibody 504-518 recognizes 5-10 ng of the purified antigen. No cross-reactivity with the related protein His7-DPYSL2 protein was observed. (C) *Crmp1* transcript levels were significantly decreased in brains of 12-week-old R6/2 mice compared to brains of wild type littermates as measured by Taqman qPCR. Taqman qPCR values were normalized to the

geometric mean of three housekeeping genes: *Atp5b*, *Eif4a2* and *Rpl13a*. Error bars are SEM using Student's t-test (n=8). \*\*p<0.01. (D) 600 bp upstream and 1000 bp downstream of the CRMP1 transcriptional start site (including exon 1) were analyzed for potential evolutionary conserved heat shock factor (HSF) binding sites using the ConTra v2 software. Several potential HSF binding sites were found upstream of the open reading frame, indicating that CRMP1 is a heat shock inducible protein. Parameters used for the identification of potential HSF binding sites are described in Table S11.

**Figure S3. Detection of the recombinant proteins CRMP1 and HTT336Q128 in transgenic flies and co-localization of CRMP1 with HTT aggregates in HD transgenic mice.** (A, B) The recombinant proteins MYC-CRMP1 and HTT336Q128 were produced in HD transgenic (Tg) flies and detected by SDS-PAGE and immunoblotting. Protein lysates of whole larvae were analyzed. (A) The recombinant protein MYC-CRMP1 (75 kDa) was detected in transgenic HD flies but not in wild-type flies. An anti-MYC antibody was used for detection. (B) Analysis of protein extracts by SDS-PAGE and immunoblotting revealed that aggregation-prone HTT336Q128 protein with a size of 55 kDa is produced in HD transgenic flies but not in wild-type (WT) flies. The endogenous protein actin was used as a loading control. (C-F) CRMP1 is expressed in differentiating neuronal photoreceptor cells and localized to neuronal projections. Confocal micrographs of a triple-labelled third instar eye/antennal imaginal discs of *w<sup>1118</sup>;GMR-GAL4/+;UAS-Hsap\CRMP1[1-1-10M]/+* *Drosophila* larvae. (C) The anti-Elav antibody 7E8A10 labels neuronal cell bodies in the eye imaginal disc. (D and F) Human CRMP1 (green) is specifically expressed in the eye imaginal disc and co-localizes (F) with the neuronal ELAV protein (C) in the differentiating photoreceptors. CRMP1, which is recognized by the anti-MYC antibody, is highly enriched in the Bolwig's nerve (arrow) originating from 12 larval photoreceptor cells (Bolwig's organ) and projecting to the eye/antennal disc via the optic stalk (arrow head) into the optic lobe anlage. The optic stark is the second structure where CRMP1 is enriched. The structures,

stained by the antibodies, mainly represent axonal projections of developing photoreceptor cells of the third instar eye imaginal disc. These results indicate that CRMP1 is actively transported into neuronal projections, supporting previous observations that the protein is critical for axonal outgrowth and guidance. (E) Cell nuclei were detected by Hoechst 33258 staining. (G) Immunofluorescence analysis of brain slices prepared from 12-week old R6/2 HD transgenic mice. Endogenous CRMP1 co-localizes with neuronal intranuclear inclusions with insoluble HTTQ150 aggregates in brains of R6/2 HD transgenic mice. HTTQ150 and CRMP1 were detected with the antibodies EM48 and anti-CRMP1 (504-518), respectively.

**Figure S4. Expression of recombinant proteins in mammalian cells and quantification of retinal degeneration in *Drosophila*.** (A) YFP-HTTex1Q79 and mCherry tagged proteins are co-expressed at similar levels in SH-EP cells. Ratios were determined by comparison of YFP and mCherry fluorescence. YFP/mCherry ratios range from 1.9 to 2.7. (B) Quantification of retinal degeneration in control (*GMR*) and HD transgenic flies.  $n \geq 6$  flies per genotype. (C) Analysis of protein extracts obtained from transfected SH-EP cells by SDS-PAGE and immunoblotting confirms the expression of the aggregation-prone proteins YFP-ATXN1Q82 and YFP-TARDBP with the size of ~140 and ~75 kDa, respectively. (D) Expression control of the mCherry-tagged proteins CRMP1, CRMP1-D408V, DNAJB6 and luciferase, which were co-expressed with the aggregation prone proteins in (C). All proteins were expressed in SH-EP cells with their expected sizes.

**Figure S5. A schematic display of a cell-free HTTex1Q49 aggregation assay and investigations of CRMP1 oligomers with computational and biochemical methods.** (A) Schematic representation of a spontaneous HTTex1Q49 aggregation assay. Soluble GST-HTTex1Q49 fusion protein was incubated with PreScission protease (PP) and either His-CRMP1 or His-CRMP1-D408V. Incubation of GST-HTTex1Q49 with PP initiates spontaneous HTTex1Q49 aggregation by removal of the GST tag. The spontaneous formation



of insoluble HTTex1Q49 aggregates was quantified over time by filter retardation assay using the anti-HTT CAG53b antibody. (B) CRMP1 homodimer with one subunit represented with wireframe and the other with ribbon (using the structure of murine CRMP1, PMID:14685275). Both subunits adopt the same structure. We focus on the subunit that is in front. CRMP1 contains two structural domains named upper lobe (green) and lower lobe (blue). D408 in CRMP1 possibly establishes a salt bridge with K397 across these lobes, contributing to the stabilization of the structure. The amino acids in the dimerization interphase region are represented by their side chains (red sticks). A higher magnification of the framed area in (B) is shown in (C). (D) CRMP1-D408V is more stable under increasing urea conditions compared to the wild-type CRMP1. Equal amounts of CRMP1 and CRMP-D408V were incubated with different concentrations of urea and analyzed by blue native PAGE and immunoblotting using an anti-CRMP1 specific antibody. (E) The urea treated proteins CRMP1 and CRMP-D408V in (D) were also analyzed under denaturing conditions using SDS-PAGE and Serva Blue staining. (F) Fluorescence emission wavelengths scan of CRMP1 and CRMP1-D408V. The proteins show a difference in intrinsic protein fluorescence, indicating the formation of different oligomeric structures. 1 mg/ml solutions of CRMP1 and CRMP1-D408V were excited at 295 nm; the emission was recorded from 320 to 425 nm. The data were collected using a M200 plate reader (Tecan, Switzerland).

## Supplemental Materials and Methods

### Cell culture conditions

**COS1 cells:** Cells were grown in Dulbecco's modified Eagle's medium (Invitrogen, Carlsbad, CA, USA) supplemented with 5% fetal calf serum (FCS), penicillin (5 U/ml) and streptomycin (5 µg/ml).

**PC12 cells:** Cells were maintained in complete medium with high glucose Dulbecco's modified Eagle's medium (DMEM with 10% HS, 5% FCS, 1% penicillin/streptomycin, 200 µg/ml G418, 2 mM glutamine and Zeocin) at 37°C and 5% CO<sub>2</sub>. Expression of HTTQ103-EGFP was induced by incubating the cells in media with 5 µM of Ponasterone A (Invitrogen).

**SH-SY5Y and SH-EP cells:** Cells were grown at 37°C and 5% CO<sub>2</sub> in Dulbecco's modified Eagle medium (DMEM) supplemented with 4.5 g/l D-glucose, 10% fetal calf serum, penicillin (100 µg/ml) and streptomycin (100 µg/ml).

**HEK293 cells:** Cells were grown in Dulbecco's modified Eagle medium (DMEM) supplemented with 4.5 g/l D-glucose, 10% fetal calf serum, penicillin (100 U/ml), streptomycin (100 µg/ml), 4 mM L-Alanyl-L-Glutamine (GlutaMAX<sup>TM</sup>) and 1 mM sodium pyruvate at 37°C and 5% CO<sub>2</sub>.

### Tissue preparation for SDS-PAGE and immunoblotting

*Cell cultures:* Total protein lysates from cultured cells were generated with lysis buffer [50mM HEPES pH7.4 with 150 mM NaCl, 2 mM MgCl<sub>2</sub>, 1 mM EDTA, 0.5% NP40, 25 U/ml Benzonase, and a protease inhibitor cocktail (Roche Diagnostics, Basel, Switzerland)]. Protein concentrations were determined using a Bio-Rad protein assay. Protein solutions were adjusted to equal amounts of total protein.

*Drosophila*: Eye imaginal discs of third instar wandering larvae were prepared and rapidly frozen by immersion in liquid nitrogen. The eye imaginal discs were homogenized in NP-40 buffer (1% NP-40, 25 U/ml Benzonase and protease inhibitors). Total protein concentrations were determined using a Bio-Rad protein assay and lysates were adjusted to a concentration of 10 µg/µl total protein. Equal amounts of total protein extracts were analyzed by SDS-PAGE and Western blotting.

*Mice*: Whole brains or striatal tissues were homogenized in lysis buffer containing 50 mM Tris-HCl (pH 7.4), 100 mM NaCl, 5 mM MgCl<sub>2</sub>, 1% NP-40, 10% glycerol, 1 mM EGTA, 25 U/ml Benzonase, and a protease inhibitor cocktail (Roche Diagnostics, Basel, Switzerland). Total protein concentrations were determined using a Bio-Rad protein assay; lysates were adjusted to 12 µg/µl of total protein. Equal amounts of protein extracts were analyzed.

### **SDS-PAGE and immunoblotting**

Purified proteins or total cell lysates were denatured, and separated by electrophoresis on 4-12% NuPAGE gels (Invitrogen). Then, proteins were transferred onto Protran BA 83 nitrocellulose membranes (Whatman, Maidstone, Kent, United Kingdom). Membranes were blocked with 5% non-fat dry milk-phosphate-buffered saline (PBS) containing 0.05% Tween-20 and probed with an appropriate primary antibody overnight at 4° C. Secondary antibodies included alkaline phosphatase-conjugated anti-mouse or anti-rabbit IgGs. Finally, membranes were incubated with ChemiGlow (ProteinSimple) and the chemiluminescence signals were detected using a LAS-3000 imaging system (Fujifilm, Tokyo, Japan). For quantification of signals the AIDA software was used.

## Detection of insoluble HTT aggregates in HD transgenic mice

For detection of neuronal intranuclear inclusions with insoluble HTT aggregates in HD mice, 12-week-old R6/2 transgenic mice (Mangiarini et al. 1996) were anaesthetized and perfused through the left cardiac ventricle with 4% paraformaldehyde (PFA). Brains were removed, post-fixed in 4% PFA for 4 hours and subsequently cryoprotected in 30% sucrose. Serial sections of 30  $\mu$ m were cut using a vibratome (Leica Microsystems GmbH, Wetzlar, Germany) and free-floating sections were collected in PBS for staining. Sections were permeabilized with 0.3% Triton X-100 and blocked in PBS supplemented with 2% bovine serum albumin (BSA) and 10% normal donkey serum (NDS). Sections were incubated overnight at 4° C with primary antibodies against HTT (EM48, 1:200) and CRMP1 (anti-CRMP1, 1:400). Alexa 549- or Alexa 488-conjugated antibodies were used as secondary antibodies (1:500, Invitrogen, Carlsbad, CA, USA). A Leica DM 2500 confocal microscope was used to detect fluorescence.

## Used *Drosophila* stocks and genotypes

Fly lines for expression of GFP (1522) and CRMP (*CRMP<sup>EY04380</sup>*, 19693) were obtained from the Bloomington *Drosophila* Stock Center (Indiana University, Bloomington, IN, USA). *y<sup>1</sup>w<sup>118</sup>*; *GMRGAL4/CyO*; *UAS-Hsap\HTT336Q128[M64]* and *Elav-GAL4*; *UAS-Hsap\HTT336Q128[F27B]* flies were provided by Juan Botas (Fred Hutchinson Cancer Research Center, Seattle, Washington). Transgenic CRMP1 flies were generated by BestGene Inc (Chino Hills, CA, USA). For all experiments, flies were kept at 25°C on standard medium.

The following genotypes were produced und used for different analyses:

*Analysis of retina degeneration: GMR-GAL4/+;UAS-Hsap\HTT336Q128/UAS-Hsap\CRMP1 [1-1-10M], GMR-GAL4/+;UAS-Hsap\HTT336Q128/UAS-Hsap\CRMP<sup>EY04380</sup>,*

*GMR-GAL4/+;UAS-Hsap\HTT336Q128/UAS-Hsap\CRMP-D408V*, *GMR-GAL4/+;UAS-Hsap\HTT336Q128/UAS-GFP[1522]*, *GMR-GAL4/+;UAS-Hsap\CRMP1 [1-1-10M]/+* and *GMR-GAL4/+* .

*Analysis of polyQ-mediated HTT aggregation: y<sup>1</sup>w<sup>118</sup>;GMR-GAL4/+;UAS-Hsap\HTT336Q128[M64]/CRMP1[1-1-10M]* (n=11 larvae), *y<sup>1</sup>w<sup>118</sup>;GMR-GAL4/+;UAS-Hsap\HTT336Q128[M64]/ CRMP<sup>EY04380</sup>* (n=14 larvae) and *y<sup>1</sup>w<sup>118</sup>;GMR-GAL4/+;UAS-Hsap\HTT336Q128/UAS-GFP[1522]* control larvae (n=9).

*Analysis of motor activity:* Wild-type flies and HD transgenic flies co-expressing HTT336Q128 and CRMP1 (*Elav-GAL4;UAS-Hsap\HTT336Q128[F27B]/UAS-Hsap\CRMP1[1-1-10M]*) or HTT336Q128 and GFP (*Elav-GAL4;UAS-Hsap\HTT336Q128[F27B]/UAS-GFP[1522]*) were analyzed.

### **Supplemental Reference**

Mangiarini L, Sathasivam K, Seller M, Cozens B, Harper A, Hetherington C, Lawton M, Trotter Y, Lehrach H, Davies SW et al. 1996. Exon 1 of the HD gene with an expanded CAG repeat is sufficient to cause a progressive neurological phenotype in transgenic mice. *Cell* **87**(3): 493-506.
