# Supplementary material for: Systematic interaction network filtering identifies CRMP1 as a novel suppressor of huntingtin misfolding and neurotoxicity
Source: HighWire-hosted journal article supplement (doi:10.1101/gr.182444.114), 2015-04-23
Supplement: Supplemental_Target_List.xlsx [file Supplemental_Target_List.xlsx]

## Sheet: Tabelle1
Human
Approved gene symbol	Approved gene name	HGNC_ID	Protein symbol	Protein Name
ATXN1	ataxin 1	HGNC:10548	ATXN1	ataxin 1
CASP6	caspase 6, apoptosis-related cysteine peptidase	HGNC:1507	CASP6	caspase 6, apoptosis-related cysteine peptidase
CFLAR	CASP8 and FADD-like apoptosis regulator	HGNC:1876	CFLAR	CASP8 and FADD-like apoptosis regulator
CRMP1	collapsin response mediator protein 1	HGNC:2365	CRMP1	collapsin response mediator protein 1
DNAJB1	DnaJ (Hsp40) homolog, subfamily B, member 1	HGNC:5270	DNAJB1	DnaJ (Hsp40) homolog, subfamily B, member 1
DNAJB6	DnaJ (Hsp40) homolog, subfamily B, member 6	HGNC:14888	DNAJB6	DnaJ (Hsp40) homolog, subfamily B, member 6
DNM1	dynamin 1	HGNC:2972	DNM1	dynamin 1
DPYSL2	dihydropyrimidinase-like 2	HGNC:3014	DPYSL2	dihydropyrimidinase-like 2
DPYSL3	dihydropyrimidinase-like 3	HGNC:3015	DPYSL3	dihydropyrimidinase-like 3
DPYSL4	dihydropyrimidinase-like 4	HGNC:3016	DPYSL4	dihydropyrimidinase-like 4
DPYSL5	dihydropyrimidinase-like 5	HGNC:20637	DPYSL5	dihydropyrimidinase-like 5
GIT1	G protein-coupled receptor kinase interacting ArfGAP 1	HGNC:4272	GIT1	G protein-coupled receptor kinase interacting ArfGAP 1
HDAC1	histone deacetylase 1	HGNC:4852	HDAC1	histone deacetylase 1
HMGA1	high mobility group AT-hook 1	HGNC:5010	HMGA1	high mobility group AT-hook 1
HMGB1	high mobility group box 1	HGNC:4983	HMGB1	high mobility group box 1
HMGB2	high mobility group box 2	HGNC:5000	HMGB2	high mobility group box 2
HSF1	heat shock transcription factor 1	HGNC:5224	HSF1	heat shock transcription factor 1
HSF2	heat shock transcription factor 2	HGNC:5225	HSF2	heat shock transcription factor 2
HSPA1A	heat shock 70kDa protein 4	HGNC:5237	HSPA1A	heat shock 70kDa protein 4
HTT	huntingtin	HGNC:4851	HTT	huntingtin
KLF6	Kruppel-like factor 6	HGNC:2235	KLF6	Kruppel-like factor 6
PACSIN1	protein kinase C and casein kinase substrate in neurons 1	HGNC:8570	PACSIN1	protein kinase C and casein kinase substrate in neurons 1
PRKCZ	protein kinase C, zeta	HGNC:9412	PRKCZ	protein kinase C, zeta
PRPF40A	PRP40 pre-mRNA processing factor 40 homolog A (S. cerevisiae)	HGNC:16463	PRPF40A	PRP40 pre-mRNA processing factor 40 homolog A (S. cerevisiae)
ROCK1	Rho-associated, coiled-coil containing protein kinase 1	HGNC:10251	ROCK1	Rho-associated, coiled-coil containing protein kinase 1
SP1	Sp1 transcription factor	HGNC:11205	SP1	Sp1 transcription factor
SYNJ1	synaptojanin 1	HGNC:11503	SYNJ1	synaptojanin 1
TARDBP	TAR DNA binding protein	HGNC:11571	TARDBP	TAR DNA binding protein
Mouse
Approved gene symbol	Approved gene name	MGI_ID	Protein symbol	Protein Name
Crmp1	collapsin response mediator protein 1	MGI:107793	CRMP1	Collapsin response mediator protein 1
Atp5b	ATP synthase, H+ transporting mitochondrial F1 complex, beta subunit	MGI:107801	ATP5B	ATP synthase, H+ transporting mitochondrial F1 complex, beta subunit
Eif4a2	eukaryotic translation initiation factor 4A2	MGI:106906	EIF4A2	eukaryotic translation initiation factor 4A2
Rpl13a	ribosomal protein L13A	MGI:1351455	RPL13A	ribosomal protein L13A
X. laevis
Approved gene symbol	Approved gene name	Xenbase_ID	Protein symbol	Protein Name
crmp1	collapsin response mediator protein 1	XB-GENE-992567	Crmp1	Collapsin response mediator protein 1
D. rerio
Approved gene symbol	Approved gene name	ZFIN-ID	Protein symbol	Protein Name
crmp1	collapsin response mediator protein 1	ZDB-GENE-050720-1	Crmp1	Collapsin response mediator protein 1
Drosophila
Approved gene symbol	Approved gene name	FlyBase_ID	Protein symbol	Protein Name
CRMP	Collapsin Response Mediator Protein	FBgn0023023	CRMP	Collapsin Response Mediator Protein
C. elegans
Approved gene symbol	Approved gene name	WormBase_ID	Protein symbol	Protein Name
dhp-2	DiHydroPyrimidinase	WBGene00000964	DHP-2	DiHydroPyrimidinase
Yeast
Approved gene symbol			Protein symbol
HSP26			Hsp26
